# Supplementary material for: Network design and analysis for multi-enzyme biocatalysis
Source: PubMed Central journal article supplement (PMC5553788; doi:10.1186/s12859-017-1773-y), 2017-08-10
Supplement: 12859_2017_1773_MOESM2_ESM.pdf [file 12859_2017_1773_MOESM2_ESM.pdf]

## Additional file 2: Pathway examples

### Contents

|          |                                                                        |           |
|----------|------------------------------------------------------------------------|-----------|
| <b>1</b> | <b>geranyl pyrophosphate</b>                                           | <b>2</b>  |
| 1.1      | pathway candidate 1: mevalonate pathway . . . . .                      | 2         |
| 1.2      | overall balance . . . . .                                              | 4         |
| 1.3      | side reactions . . . . .                                               | 6         |
| 1.4      | pathway candidate: non-mevalonate pathway . . . . .                    | 9         |
| 1.5      | overall balance . . . . .                                              | 11        |
| 1.6      | side reactions . . . . .                                               | 13        |
| <b>2</b> | <b>amygdalin</b>                                                       | <b>19</b> |
| 2.1      | pathway candidate: starting from sucrose . . . . .                     | 19        |
| 2.2      | thermodynamic profile . . . . .                                        | 21        |
| 2.3      | overall balance . . . . .                                              | 22        |
| 2.4      | side reactions . . . . .                                               | 24        |
| 2.5      | pathway candidate: starting from $\alpha$ -D-Glucose 6-phosphate . . . | 25        |
| 2.6      | thermodynamic profile . . . . .                                        | 27        |
| 2.7      | overall balance . . . . .                                              | 28        |
| 2.8      | side reactions . . . . .                                               | 30        |
| <b>3</b> | <b>pyrrollysine</b>                                                    | <b>31</b> |
| 3.1      | pathway candidate . . . . .                                            | 31        |
| 3.2      | thermodynamic profile . . . . .                                        | 33        |
| 3.3      | overall balance . . . . .                                              | 34        |
| 3.4      | side reactions . . . . .                                               | 36        |
| <b>4</b> | <b>(S)-2-Phenylloxirane</b>                                            | <b>39</b> |
| 4.1      | pathway candidate . . . . .                                            | 39        |
| 4.2      | thermodynamic profile . . . . .                                        | 41        |
| 4.3      | overall balance . . . . .                                              | 42        |
| 4.4      | side reactions . . . . .                                               | 44        |

# 1 geranyl pyrophosphate

## 1.1 pathway candidate 1: mevalonate pathway

number of active reactions: 8  
starts with basic: False  
reactions w/o dG: 0  
sum (dG + |dG|): 0  
dG: -2.154517e+02  
number of heterologous enzymes: 5  
number of cofactors: 8

number of side reactions: 11

R08549 : 2-Oxoglutarate dehydrogenase complex -2.723933  
e+01

substrates:

|   |        |                |
|---|--------|----------------|
| 1 | C00026 | 2-Oxoglutarate |
| 1 | C00010 | CoA            |
| 1 | C00003 | NAD+           |

products:

|   |        |              |
|---|--------|--------------|
| 1 | C00091 | Succinyl-CoA |
| 1 | C00011 | CO2          |
| 1 | C00004 | NADH         |
| 1 | C00080 | H+           |

R02084 : succinyl-CoA:3-hydroxy-3-methylglutarate CoA-  
transferase -3.166626e+00

substrates:

|   |        |                                 |
|---|--------|---------------------------------|
| 1 | C00091 | Succinyl-CoA                    |
| 1 | C03761 | 3-Hydroxy-3-<br>methylglutarate |

products:

|   |        |                                        |
|---|--------|----------------------------------------|
| 1 | C00042 | Succinate                              |
| 1 | C00356 | (S)-3-Hydroxy-3-<br>methylglutaryl-CoA |

R02082 : (R)-Mevalonate:NADP+ oxidoreductase (CoA  
acylating) -2.534910e+01

substrates:

|   |        |                  |
|---|--------|------------------|
| 1 | C00356 | (S)-3-Hydroxy-3- |
|---|--------|------------------|

|                                                          |             |        |                           |
|----------------------------------------------------------|-------------|--------|---------------------------|
|                                                          |             |        | methylglutaryl-CoA        |
|                                                          | 2           | C00005 | NADPH                     |
|                                                          | 2           | C00080 | H+                        |
|                                                          | products:   |        |                           |
|                                                          | 1           | C00418 | (R)-Mevalonate            |
|                                                          | 1           | C00010 | CoA                       |
|                                                          | 2           | C00006 | NADP+                     |
| R02245 : ATP:(R)-mevalonate 5-phosphotransferase         |             |        |                           |
| -1.348146e+01                                            |             |        |                           |
|                                                          | substrates: |        |                           |
|                                                          | 1           | C00002 | ATP                       |
|                                                          | 1           | C00418 | (R)-Mevalonate            |
|                                                          | products:   |        |                           |
|                                                          | 1           | C00008 | ADP                       |
|                                                          | 1           | C01107 | (R)-5-Phosphomevalonate   |
| R03245 : ATP:(R)-5-phosphomevalonate phosphotransferase  |             |        |                           |
| -2.712405e+00                                            |             |        |                           |
|                                                          | substrates: |        |                           |
|                                                          | 1           | C00002 | ATP                       |
|                                                          | 1           | C01107 | (R)-5-Phosphomevalonate   |
|                                                          | products:   |        |                           |
|                                                          | 1           | C00008 | ADP                       |
|                                                          | 1           | C01143 | (R)-5-Diphosphomevalonate |
| R01121 : ATP:(R)-5-diphosphomevalonate carboxy-lyase (   |             |        |                           |
| adding ATP -6.741552e+01                                 |             |        |                           |
|                                                          | substrates: |        |                           |
|                                                          | 1           | C00002 | ATP                       |
|                                                          | 1           | C01143 | (R)-5-Diphosphomevalonate |
|                                                          | products:   |        |                           |
|                                                          | 1           | C00008 | ADP                       |
|                                                          | 1           | C00009 | Orthophosphate            |
|                                                          | 1           | C00129 | Isopentenyl diphosphate   |
|                                                          | 1           | C00011 | CO2                       |
| R01123 : Isopentenyl-diphosphate delta3-delta2-isomerase |             |        |                           |
| -4.902559e+00                                            |             |        |                           |

substrates:  
1 C00129 Isopentenyl diphosphate

products:  
1 C00235 Dimethylallyl diphosphate

R01658 : Dimethylallyl-diphosphate:isopentenyl-  
diphosphate dimethylallyltranstransferase  
-7.118467e+01

substrates:  
1 C00235 Dimethylallyl diphosphate  
1 C00129 Isopentenyl diphosphate

products:  
1 C00013 Diphosphate  
1 C00341 Geranyl diphosphate

## 1.2 overall balance



### 1.3 side reactions

R00089 : ATP diphosphate-lyase (cyclizing

substrates:

1 C00002 ATP

products:

1 C00575 3',5'-Cyclic AMP

1 C00013 Diphosphate

R00104 : ATP:NAD<sup>+</sup> 2'-phosphotransferase

substrates:

1 C00002 ATP

1 C00003 NAD<sup>+</sup>

products:

1 C00008 ADP

1 C00006 NADP<sup>+</sup>

R00112 : NADPH:NAD<sup>+</sup> oxidoreductase

substrates:

1 C00005 NADPH

1 C00003 NAD<sup>+</sup>

products:

1 C00006 NADP<sup>+</sup>

1 C00004 NADH

R00405 : Succinate:CoA ligase (ADP-forming)

substrates:

1 C00002 ATP

1 C00042 Succinate

1 C00010 CoA

products:

1 C00008 ADP

1 C00009 Orthophosphate

1 C00091 Succinyl-CoA

R02003 : Geranyl-diphosphate:isopentenyl-diphosphate  
geranyltrans-transferase

substrates:  
 1 C00341 Geranyl diphosphate  
 1 C00129 Isopentenyl diphosphate

products:  
 1 C00013 Diphosphate  
 1 C00448 trans , trans-Farnesyl  
 diphosphate

-R00127 : -ATP:AMP phosphotransferase

substrates:  
 2 C00008 ADP

products:  
 1 C00002 ATP  
 1 C00020 AMP

-R00130 : -ATP:dephospho-CoA 3'-phosphotransferase

substrates:  
 1 C00008 ADP  
 1 C00010 CoA

products:  
 1 C00002 ATP  
 1 C00882 Dephospho-CoA

-R00137 : -ATP:nicotinamide-nucleotide  
 adenylyltransferase

substrates:  
 1 C00013 Diphosphate  
 1 C00003 NAD<sup>+</sup>

products:  
 1 C00002 ATP  
 1 C00455 Nicotinamide D-  
 ribonucleotide

-R00267 : -Isocitrate:NADP<sup>+</sup> oxidoreductase (  
 decarboxylating)

substrates:  
 1 C00026 2-Oxoglutarate  
 1 C00011 CO<sub>2</sub>

|                                                     |             |        |                       |
|-----------------------------------------------------|-------------|--------|-----------------------|
|                                                     | 1           | C00005 | NADPH                 |
|                                                     | 1           | C00080 | H+                    |
|                                                     | products:   |        |                       |
|                                                     | 1           | C00311 | Isocitrate            |
|                                                     | 1           | C00006 | NADP+                 |
| -R00519 : -formate:NAD+ oxidoreductase              |             |        |                       |
|                                                     | substrates: |        |                       |
|                                                     | 1           | C00080 | H+                    |
|                                                     | 1           | C00011 | CO2                   |
|                                                     | 1           | C00004 | NADH                  |
|                                                     | products:   |        |                       |
|                                                     | 1           | C00058 | Formate               |
|                                                     | 1           | C00003 | NAD+                  |
| -R00833 : -(R)-Methylmalonyl-CoA CoA-carbonylmutase |             |        |                       |
|                                                     | substrates: |        |                       |
|                                                     | 1           | C00091 | Succinyl-CoA          |
|                                                     | products:   |        |                       |
|                                                     | 1           | C01213 | (R)-Methylmalonyl-CoA |



## 1.4 pathway candidate: non-mevalonate pathway

number of active reactions: 9  
starts with basic: False  
reactions w/o dG: 2  
sum (dG + |dG|):0  
dG: -1.998150e+02  
number of heterologous enzymes: 0  
number of cofactors: 3

number of side reactions: 24

R05636 : 1-Deoxy-D-xylulose 5-phosphate pyruvate-lyase (carboxylating) -2.901798e+01

substrates:

|   |        |                              |
|---|--------|------------------------------|
| 1 | C00022 | Pyruvate                     |
| 1 | C00118 | D-Glyceraldehyde 3-phosphate |

products:

|   |        |                                |
|---|--------|--------------------------------|
| 1 | C11437 | 1-Deoxy-D-xylulose 5-phosphate |
| 1 | C00011 | CO2                            |

R05688 : 1-Deoxy-D-xylulose 5-phosphate isomeroreductase -2.321112e+01

substrates:

|   |        |                                |
|---|--------|--------------------------------|
| 1 | C11437 | 1-Deoxy-D-xylulose 5-phosphate |
| 1 | C00005 | NADPH                          |
| 1 | C00080 | H+                             |

products:

|   |        |                                     |
|---|--------|-------------------------------------|
| 1 | C11434 | 2-C-Methyl-D-erythritol 4-phosphate |
| 1 | C00006 | NADP+                               |

R05633 : CTP: 2-C-Methyl-D-erythritol 4-phosphate cytidyltransferase -4.729713e+00

substrates:

|   |        |                                     |
|---|--------|-------------------------------------|
| 1 | C11434 | 2-C-Methyl-D-erythritol 4-phosphate |
| 1 | C00063 | CTP                                 |

```

products:
  1          C11435  4-(Cytidine 5'-diphospho)
                    -2-C-methyl-D-erythritol
  1          C00013  Diphosphate

R05634 : ATP:4-(Cytidine 5'-diphospho)-2-C-methyl-D-
        erythritol 2-phosphotransferase          -5.273891e+00

substrates:
  1          C11435  4-(Cytidine 5'-diphospho)
                    -2-C-methyl-D-erythritol
  1          C00002  ATP

products:
  1          C11436  2-Phospho-4-(cytidine 5'-
                    diphospho)-2-C-methyl-D-erythritol
  1          C00008  ADP

R05637 : 2-Phospho-4-(cytidine 5'-diphospho)-2-C-methyl-D-
        -erythritol CMP-lyase (cyclizing)          0

substrates:
  1          C11436  2-Phospho-4-(cytidine 5'-
                    diphospho)-2-C-methyl-D-erythritol

products:
  1          C11453  2-C-Methyl-D-erythritol
                    2,4-cyclodiphosphate
  1          C00055  CMP

R08689 : (E)-4-hydroxy-3-methylbut-2-en-1-yl-diphosphate:
        oxidized ferredoxin oxidoreductase (hydrating) 0

substrates:
  1          C11453  2-C-Methyl-D-erythritol
                    2,4-cyclodiphosphate
  2          C00138  Reduced ferredoxin

products:
  1          C11811  1-Hydroxy-2-methyl-2-
                    butenyl 4-diphosphate
  1          C00001  H2O
  2          C00139  Oxidized ferredoxin

R08210 : dimethylallyl diphosphate:ferredoxin

```

oxidoreductase -6.639758e+01

substrates:

|   |        |                       |
|---|--------|-----------------------|
| 1 | C11811 | 1-Hydroxy-2-methyl-2- |
|   |        | butenyl 4-diphosphate |
| 2 | C00138 | Reduced ferredoxin    |
| 2 | C00080 | H+                    |

products:

|   |        |                           |
|---|--------|---------------------------|
| 1 | C00235 | Dimethylallyl diphosphate |
| 1 | C00001 | Oxidized ferredoxin       |
| 2 | C00139 | H2O                       |

R01658 : Dimethylallyl-diphosphate:isopentenyl-  
diphosphate dimethylallyltransferase  
-7.118467e+01

substrates:

|   |        |                           |
|---|--------|---------------------------|
| 1 | C00235 | Dimethylallyl diphosphate |
| 1 | C00129 | Isopentenyl diphosphate   |

products:

|   |        |                     |
|---|--------|---------------------|
| 1 | C00013 | Diphosphate         |
| 1 | C00341 | Geranyl diphosphate |

---

-R01123 : -Isopentenyl-diphosphate delta3-delta2-  
isomerase 0

substrates:

|   |        |                           |
|---|--------|---------------------------|
| 1 | C00235 | Dimethylallyl diphosphate |
|---|--------|---------------------------|

products:

|   |        |                         |
|---|--------|-------------------------|
| 1 | C00129 | Isopentenyl diphosphate |
|---|--------|-------------------------|

## 1.5 overall balance

Table 2: Overall balance of the pathway candidate representing the non-mevalonate pathway

|                              |                                      | R01658 | R05633 | R05634 | R05636 | R05637 | R05688 | R08210 | R08689 | -R01123 | overall |
|------------------------------|--------------------------------------|--------|--------|--------|--------|--------|--------|--------|--------|---------|---------|
| Dimethylallyl                | diphosphate                          | -1     | 0      | 0      | 0      | 0      | 0      | 1      | 0      | -1      | -1      |
| Isopentenyl                  | diphosphate                          | -1     | 0      | 0      | 0      | 0      | 0      | 0      | 0      | 1       | 0       |
| Diphosphate                  |                                      | 1      | 1      | 0      | 0      | 0      | 0      | 0      | 0      | 0       | 2       |
| Geranyl                      | diphosphate                          | 1      | 0      | 0      | 0      | 0      | 0      | 0      | 0      | 0       | 1       |
| 2-C-Methyl-D-erythritol      | 4-phosphate                          | 0      | -1     | 0      | 0      | 0      | 1      | 0      | 0      | 0       | 0       |
| CTP                          |                                      | 0      | -1     | 0      | 0      | 0      | 0      | 0      | 0      | 0       | -1      |
| 4-(Cytidine                  | 5-diphospho)-2-C-methyl-D-erythritol | 0      | 1      | -1     | 0      | 0      | 0      | 0      | 0      | 0       | 0       |
| ATP                          |                                      | 0      | 0      | -1     | 0      | 0      | 0      | 0      | 0      | 0       | -1      |
| 2-Phospho-4-(cytidine        | 5-diphospho)-2-C-methyl-D-erythritol | 0      | 0      | 1      | 0      | -1     | 0      | 0      | 0      | 0       | 0       |
| ADP                          |                                      | 0      | 0      | 1      | 0      | 0      | 0      | 0      | 0      | 0       | 1       |
| Pyruvate                     |                                      | 0      | 0      | 0      | -1     | 0      | 0      | 0      | 0      | 0       | -1      |
| D-Glyceraldehyde             | 3-phosphate                          | 0      | 0      | 0      | -1     | 0      | 0      | 0      | 0      | 0       | -1      |
| 1-Deoxy-D-xylulose           | 5-phosphate                          | 0      | 0      | 0      | 1      | 0      | -1     | 0      | 0      | 0       | 0       |
| CO2                          |                                      | 0      | 0      | 0      | 1      | 0      | 0      | 0      | 0      | 0       | 1       |
| 2-C-Methyl-D-erythritol      | 2,4-cyclodiphosphate                 | 0      | 0      | 0      | 0      | 1      | 0      | 0      | -1     | 0       | 0       |
| CMP                          |                                      | 0      | 0      | 0      | 0      | 1      | 0      | 0      | 0      | 0       | 1       |
| NADPH                        |                                      | 0      | 0      | 0      | 0      | 0      | -1     | 0      | 0      | 0       | -1      |
| H+                           |                                      | 0      | 0      | 0      | 0      | 0      | -1     | -2     | 0      | 0       | -3      |
| NADP+                        |                                      | 0      | 0      | 0      | 0      | 0      | 1      | 0      | 0      | 0       | 1       |
| 1-Hydroxy-2-methyl-2-butenyl | 4-diphosphate                        | 0      | 0      | 0      | 0      | 0      | 0      | -1     | 1      | 0       | 0       |
| Reduced ferredoxin           |                                      | 0      | 0      | 0      | 0      | 0      | 0      | -2     | -2     | 0       | -4      |
| Oxidized ferredoxin          |                                      | 0      | 0      | 0      | 0      | 0      | 0      | 2      | 2      | 0       | 4       |
| H2O                          |                                      | 0      | 0      | 0      | 0      | 0      | 0      | 1      | 1      | 0       | 2       |

## 1.6 side reactions

R00004 : diphosphate phosphohydrolase

substrates:

|   |        |             |
|---|--------|-------------|
| 1 | C00013 | Diphosphate |
| 1 | C00001 | H2O         |

products:

|   |        |                |
|---|--------|----------------|
| 2 | C00009 | Orthophosphate |
|---|--------|----------------|

R00086 : ATP phosphohydrolase

substrates:

|   |        |     |
|---|--------|-----|
| 1 | C00002 | ATP |
| 1 | C00001 | H2O |

products:

|   |        |                |
|---|--------|----------------|
| 1 | C00008 | ADP            |
| 1 | C00009 | Orthophosphate |

R00087 : ATP diphosphohydrolase (diphosphate-forming)

substrates:

|   |        |     |
|---|--------|-----|
| 1 | C00002 | ATP |
| 1 | C00001 | H2O |

products:

|   |        |             |
|---|--------|-------------|
| 1 | C00020 | AMP         |
| 1 | C00013 | Diphosphate |

R00089 : ATP diphosphate-lyase (cyclizing

substrates:

|   |        |     |
|---|--------|-----|
| 1 | C00002 | ATP |
|---|--------|-----|

products:

|   |        |                |
|---|--------|----------------|
| 1 | C00575 | 3,5-Cyclic AMP |
| 1 | C00013 | Diphosphate    |

R00199 : ATP:pyruvate,water phosphotransferase

substrates:

|   |        |          |
|---|--------|----------|
| 1 | C00002 | ATP      |
| 1 | C00022 | Pyruvate |
| 1 | C00001 | H2O      |

products:  
 1 C00020 AMP  
 1 C00074 Phosphoenolpyruvate  
 1 C00009 Orthophosphate

R00200 : ATP:pyruvate 2-O-phosphotransferase

substrates:  
 1 C00002 ATP  
 1 C00022 Pyruvate

products:  
 1 C00008 ADP  
 1 C00074 Phosphoenolpyruvate

R00511 : cytidine-5-monophosphate phosphohydrolase

substrates:  
 1 C00055 CMP  
 1 C00001 H2O

products:  
 1 C00475 Cytidine  
 1 C00009 Orthophosphate

R00512 : ATP:TMP phosphotransferase

substrates:  
 1 C00002 ATP  
 1 C00055 CMP

products:  
 1 C00008 ADP  
 1 C00112 CDP

R00515 : CTP diphosphohydrolase (diphosphate-forming)

substrates:  
 1 C00063 CTP  
 1 C00001 H2O

products:  
 1 C00055 CMP  
 1 C00013 Diphosphate

R00568 : CTP aminohydrolase

substrates:

|   |        |     |
|---|--------|-----|
| 1 | C00063 | CTP |
| 1 | C00001 | H2O |

products:

|   |        |         |
|---|--------|---------|
| 1 | C00075 | UTP     |
| 1 | C00014 | Ammonia |

R00572 : CTP:pyruvate 2-O-phosphotransferase

substrates:

|   |        |          |
|---|--------|----------|
| 1 | C00063 | CTP      |
| 1 | C00022 | Pyruvate |

products:

|   |        |                     |
|---|--------|---------------------|
| 1 | C00112 | CDP                 |
| 1 | C00074 | Phosphoenolpyruvate |

R01015 : D-glyceraldehyde-3-phosphate aldose-ketose-isomerase

substrates:

|   |        |                              |
|---|--------|------------------------------|
| 1 | C00118 | D-Glyceraldehyde 3-phosphate |
|---|--------|------------------------------|

products:

|   |        |                     |
|---|--------|---------------------|
| 1 | C00111 | Glycerone phosphate |
|---|--------|---------------------|

R01123 : Isopentenyl-diphosphate delta3-delta2-isomerase

substrates:

|   |        |                         |
|---|--------|-------------------------|
| 1 | C00129 | Isopentenyl diphosphate |
|---|--------|-------------------------|

products:

|   |        |                           |
|---|--------|---------------------------|
| 1 | C00235 | Dimethylallyl diphosphate |
|---|--------|---------------------------|

R01195 : Ferredoxin:NADP+ oxidoreductase

substrates:

|   |        |                    |
|---|--------|--------------------|
| 1 | C00006 | Reduced ferredoxin |
| 1 | C00080 | NADP+              |
| 2 | C00138 | H+                 |

products:

1 C00005 Oxidized ferredoxin  
2 C00139 NADPH

R02003 : Geranyl-diphosphate:isopentenyl-diphosphate  
geranyltrans-transferase

substrates:

1 C00341 Geranyl diphosphate  
1 C00129 Isopentenyl diphosphate

products:

1 C00013 Diphosphate  
1 C00448 trans , trans-Farnesyl  
diphosphate

R05884 : isopentenyl-diphosphate:ferredoxin  
oxidoreductase

substrates:

1 C11811 1-Hydroxy-2-methyl-2-  
butenyl 4-diphosphate  
2 C00138 Reduced ferredoxin  
2 C00080 H+

products:

1 C00129 Isopentenyl diphosphate  
1 C00001 Oxidized ferredoxin  
2 C00139 H<sub>2</sub>O

-R00104 : -ATP:NAD<sup>+</sup> 2-phosphotransferase

substrates:

1 C00008 ADP  
1 C00006 NAD<sup>+</sup>

products:

1 C00002 ATP  
1 C00003 NAD<sup>+</sup>

-R00127 : -ATP:AMP phosphotransferase

substrates:

2 C00008 ADP

products:

1 C00002 ATP



1 C00020 AMP  
 -R00132 : -carbonate hydro-lyase (carbon-dioxide-forming)  
 substrates:  
 1 C00011 CO2  
 1 C00001 H2O  
 products:  
 1 C01353 Carbonic acid  
 -R00216 : -(S)-Malate:NADP+ oxidoreductase(oxaloacetate-  
 decarboxylating)  
 substrates:  
 1 C00022 Pyruvate  
 1 C00011 CO2  
 1 C00005 NADPH  
 1 C00080 H+  
 products:  
 1 C00149 (S)-Malate  
 1 C00006 NADP+  
 -R00513 : -ATP:cytidine 5-phosphotransferase  
 substrates:  
 1 C00008 ADP  
 1 C00055 CMP  
 products:  
 1 C00002 ATP  
 1 C00475 Cytidine  
 -R01064 : -2-dehydro-3-deoxy-6-phospho-D-galactonate D-  
 glyceraldehyde-3-phospho-lyase (pyruvate-forming)  
 substrates:  
 1 C00022 Pyruvate  
 1 C00118 D-Glyceraldehyde 3-  
 phosphate  
 products:  
 1 C01286 2-Dehydro-3-deoxy-6-  
 phospho-D-galactonate

-R05605 : -2-dehydro-3-deoxy-6-phospho-D-gluconate D-glyceraldehyde-3-phosphate-lyase (pyruvate-forming)

substrates:

|   |        |                              |
|---|--------|------------------------------|
| 1 | C00118 | D-Glyceraldehyde 3-phosphate |
| 1 | C00022 | Pyruvate                     |

products:

|   |        |                                         |
|---|--------|-----------------------------------------|
| 1 | C04442 | 2-Dehydro-3-deoxy-6-phospho-D-gluconate |
|---|--------|-----------------------------------------|

-R10092 : -carbonate hydro-lyase (carbon-dioxide-forming)

substrates:

|   |        |                  |
|---|--------|------------------|
| 1 | C00011 | CO <sub>2</sub>  |
| 1 | C00001 | H <sub>2</sub> O |

products:

|   |        |                               |
|---|--------|-------------------------------|
| 1 | C00288 | HCO <sub>3</sub> <sup>-</sup> |
| 1 | C00080 | H <sup>+</sup>                |

## 2 amygdalin

### 2.1 pathway candidate: starting from sucrose

number of active reactions: 4  
starts with basic: True  
reactions w/o dG: 0  
sum (dG + |dG|):9.763018e-02  
dG: -4.130443e+01  
number of heterologous enzymes: 2  
number of cofactors: 1  
number of side reactions: 4

R00803 : sucrose:phosphate alpha-D-glucosyltransferase  
4.881509e-02

substrates:

|   |        |                |
|---|--------|----------------|
| 1 | C00089 | Sucrose        |
| 1 | C00009 | Orthophosphate |

products:

|   |        |                       |
|---|--------|-----------------------|
| 1 | C00095 | D-Fructose            |
| 1 | C00103 | D-Glucose 1-phosphate |

R00289 : UTP:alpha-D-glucose-1-phosphate  
uridylyltransferase -8.295754e+00

substrates:

|   |        |                       |
|---|--------|-----------------------|
| 1 | C00075 | UTP                   |
| 1 | C00103 | D-Glucose 1-phosphate |

products:

|   |        |             |
|---|--------|-------------|
| 1 | C00013 | Diphosphate |
| 1 | C00029 | UDP-glucose |

R10638 : UDP-D-glucose:(R)-mandelonitrile beta-D-  
glucosyltransferase -1.412458e+01

substrates:

|   |        |                |
|---|--------|----------------|
| 1 | C00561 | Mandelonitrile |
| 1 | C00029 | UDP-glucose    |

products:

|   |        |          |
|---|--------|----------|
| 1 | C00844 | Prunasin |
| 1 | C00015 | UDP      |

R10639 :            -1.893291e+01

substrates:

|   |        |             |
|---|--------|-------------|
| 1 | C00844 | Prunasin    |
| 1 | C00029 | UDP-glucose |

products:

|   |        |           |
|---|--------|-----------|
| 1 | C08325 | Amygdalin |
| 1 | C00015 | UDP       |

## 2.2 thermodynamic profile

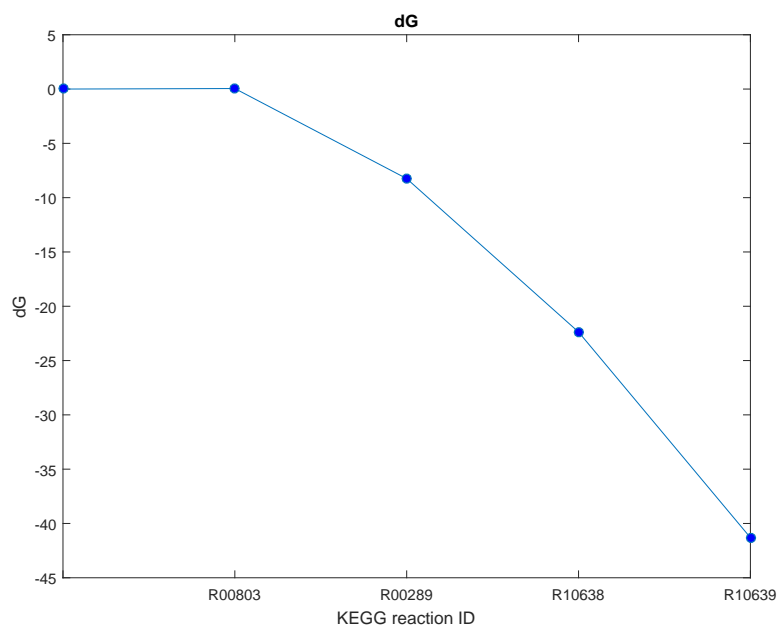

Figure 1: Thermodynamic profile for the pathway candidate for the synthesis of amygdalin from sucrose.

## 2.3 overall balance

reaction R00289

substrates:

1 C00013  
1 C00029

products:

1 C00075  
1 C00103

reaction R00803

substrates:

1 C00095  
1 C00103

products:

1 C00089  
1 C00009

reaction R10638

substrates:

1 C00844  
1 C00015

products:

1 C00561  
1 C00029

reaction R10639

substrates:

1 C08325  
1 C00015

products:

1 C00844  
1 C00029

overall:

C00009 1  
C00013 -1  
C00015 -2

C00029 1  
C00075 1  
C00089 1  
C00095 -1  
C00103 0  
C00561 1  
C00844 0  
C08325 -1

not balanced:

C00009 1  
C00013 -1  
C00015 -2  
C00029 1  
C00075 1  
C00089 1  
C00095 -1  
C00561 1  
C08325 -1

## 2.4 side reactions

R00291 : UDP-glucose 4-epimerase

substrates:  
1 C00029 UDP-glucose

products:  
1 C00052 UDP-alpha-D-galactose

R00959 : alpha-D-Glucose 1-phosphate 1,6-phosphomutase

substrates:  
1 C00103 D-Glucose 1-phosphate

products:  
1 C00668 alpha-D-Glucose 6-phosphate

R08639 : alpha-D-glucose 1,6-phosphomutase

substrates:  
1 C00103 D-Glucose 1-phosphate

products:  
1 C00092 D-Glucose 6-phosphate

-R00878 : -alpha-D-Glucose aldose-ketose-isomerase

substrates:  
1 C00095 D-Fructose

products:  
1 C00267 alpha-D-Glucose



## 2.5 pathway candidate: starting from $\alpha$ -D-Glucose 6-phosphate

number of active reactions: 4  
starts with basic: False  
reactions w/o dG: 0  
sum (dG + |dG|): 2.070859e+00  
dG: -3.202206e+01  
number of heterologous enzymes: 2  
number of cofactors: 1  
number of side reactions: 5

-R00959 :  $\alpha$ -D-Glucose 1-phosphate 1,6-phosphomutase  
4.881509e-02

substrates:

1 C00668  $\alpha$ -D-Glucose 6-phosphate

products:

1 C00103 D-Glucose 1-phosphate

R00289 : UTP: $\alpha$ -D-glucose-1-phosphate  
uridylyltransferase -1.412458e+01

substrates:

1 C00075 UTP  
1 C00103 D-Glucose 1-phosphate

products:

1 C00013 Diphosphate  
1 C00029 UDP-glucose

R10638 : UDP-D-glucose:(R)-mandelonitrile beta-D-glucosyltransferase  
-1.893291e+01

substrates:

1 C00561 Mandelonitrile  
1 C00029 UDP-glucose

products:

1 C00844 Prunasin  
1 C00015 UDP

R10639 : 9.866146e-01

substrates:

|   |        |             |
|---|--------|-------------|
| 1 | C00844 | Prunasin    |
| 1 | C00029 | UDP-glucose |

products:

|   |        |           |
|---|--------|-----------|
| 1 | C08325 | Amygdalin |
| 1 | C00015 | UDP       |

## 2.6 thermodynamic profile

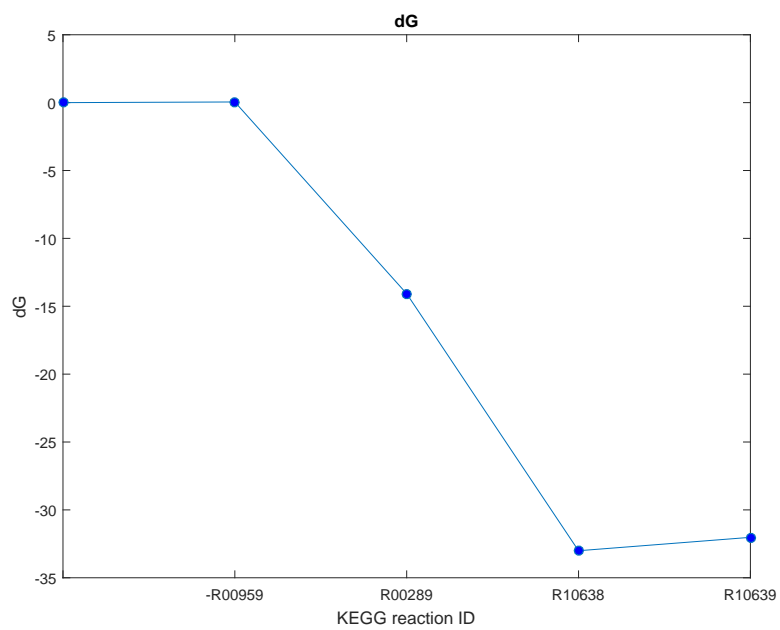

Figure 2: Thermodynamic profile for the pathway candidate for the synthesis of amygdalin from  $\alpha$ -D-Glucose 6-phosphate.

## 2.7 overall balance

reaction R00289

substrates:

1 C00013  
1 C00029

products:

1 C00075  
1 C00103

reaction R10638

substrates:

1 C00844  
1 C00015

products:

1 C00561  
1 C00029

reaction R10639

substrates:

1 C08325  
1 C00015

products:

1 C00844  
1 C00029

reaction R00959

substrates:

1 C00668

products:

1 C00103

overall:

C00013 -1  
C00015 -2  
C00029 1  
C00075 1  
C00103 2

C00561 1  
C00668 -1  
C00844 0  
C08325 -1

not balanced:

C00013 -1  
C00015 -2  
C00029 1  
C00075 1  
C00103 2  
C00561 1  
C00668 -1  
C08325 -1

## 2.8 side reactions

R00291 : UDP-glucose 4-epimerase

substrates:  
1 C00029 UDP-glucose

products:  
1 C00052 UDP-alpha-D-galactose

R00959 : alpha-D-Glucose 1-phosphate 1,6-phosphomutase

substrates:  
1 C00103 D-Glucose 1-phosphate

products:  
1 C00668 alpha-D-Glucose 6-phosphate

R02737 : UDPglucose:D-glucose -6-phosphate 1-alpha-D-glucosyltransferase

substrates:  
1 C00029 UDP-glucose  
1 C00668 alpha-D-Glucose 6-phosphate

products:  
1 C00015 UDP  
1 C00689 alpha , alpha'-Trehalose 6-phosphate

R02740 : alpha-D-Glucose 6-phosphate ketol-isomerase

substrates:  
1 C00668 alpha-D-Glucose 6-phosphate

products:  
1 C05345 beta-D-Fructose 6-phosphate

R08639 : alpha-D-glucose 1,6-phosphomutase

substrates:  
1 C00103 D-Glucose 1-phosphate

products:  
1 C00092 D-Glucose 6-phosphate

### 3 pyrrolysine

#### 3.1 pathway candidate

number of active reactions: 4  
starts with basic: True  
reactions w/o dG: 4  
sum (dG + |dG|): 0  
dG: 0  
number of heterologous enzymes: 4  
number of cofactors: 2  
number of side reactions: 9

R10010 : L-lysine carboxy-aminomethylmutase 0

substrates:

1 C00047 L-Lysine

products:

1 C20277 (2R,3R)-3-Methylornithine

R10011 : 0

substrates:

1 C00047 L-Lysine

1 C20277 (2R,3R)-3-Methylornithine

1 C00002 ATP

products:

1 C20278 (2R,3R)-3-Methylornithinyl-N6-lysine

1 C07305 Products of ATP breakdown

R10012 : 0

substrates:

1 C20278 (2R,3R)-3-Methylornithinyl-N6-lysine

1 C00003 NAD+

1 C00001 H2O

products:

1 C20279 (2R,3R)-3-Methylglutamyl-5-semialdehyde-N6-lysine

1 C00014 Ammonia

1 C00004 NADH

R10013 : 0

substrates:

1 C20279 (2R,3R)-3-Methylglutamyl  
-5-semialdehyde-N6-lysine

products:

1 C16138 L-Pyrrolysine  
1 C00001 H2O



### 3.2 overall balance

```
reaction R10010
substrates:
    1 C20277
products:
    1 C00047
reaction R10011
substrates:
    1 C20278
    1 C07305
products:
    1 C00047
    1 C20277
    1 C00002
reaction R10012
substrates:
    1 C20279
    1 C00014
    1 C00004
products:
    1 C20278
    1 C00003
    1 C00001
reaction R10013
substrates:
    1 C16138
    1 C00001
products:
    1 C20279
overall:
C00001  0
C00002  1
```

C00003 1  
C00004 -1  
C00014 -1  
C00047 2  
C07305 -1  
C16138 -1  
C20277 0  
C20278 0  
C20279 0

not balanced:

C00002 1  
C00003 1  
C00004 -1  
C00014 -1  
C00047 2  
C07305 -1  
C16138 -1

### 3.3 side reactions

R00086 : ATP phosphohydrolase

substrates:

|   |        |     |
|---|--------|-----|
| 1 | C00002 | ATP |
| 1 | C00001 | H2O |

products:

|   |        |                |
|---|--------|----------------|
| 1 | C00008 | ADP            |
| 1 | C00009 | Orthophosphate |

R00087 : ATP diphosphohydrolase (diphosphate-forming)

substrates:

|   |        |     |
|---|--------|-----|
| 1 | C00002 | ATP |
| 1 | C00001 | H2O |

products:

|   |        |             |
|---|--------|-------------|
| 1 | C00020 | AMP         |
| 1 | C00013 | Diphosphate |

R00089 : ATP diphosphate-lyase (cyclizing)

substrates:

|   |        |     |
|---|--------|-----|
| 1 | C00002 | ATP |
|---|--------|-----|

products:

|   |        |                  |
|---|--------|------------------|
| 1 | C00575 | 3',5'-Cyclic AMP |
| 1 | C00013 | Diphosphate      |

R00103 : NAD<sup>+</sup> phosphohydrolase

substrates:

|   |        |                  |
|---|--------|------------------|
| 1 | C00003 | NAD <sup>+</sup> |
| 1 | C00001 | H2O              |

products:

|   |        |                               |
|---|--------|-------------------------------|
| 1 | C00020 | AMP                           |
| 1 | C00455 | Nicotinamide D-ribonucleotide |

R00104 : ATP:NAD<sup>+</sup> 2'-phosphotransferase

substrates:

|   |        |                  |
|---|--------|------------------|
| 1 | C00002 | ATP              |
| 1 | C00003 | NAD <sup>+</sup> |

products:  
1 C00008 ADP  
1 C00006 NADP+

R00143 : ammonia:NAD+ oxidoreductase

substrates:  
1 C00014 Ammonia  
1 C00003 NAD+  
1 C00001 H2O

products:  
1 C00192 Hydroxylamine  
1 C00004 NADH  
1 C00080 H+

R00462 : L-lysine carboxy-lyase (cadaverine-forming)

substrates:  
1 C00047 L-Lysine

products:  
1 C01672 Cadaverine  
1 C00011 CO2

R00787 : ammonia:NAD+ oxidoreductase

substrates:  
1 C00014 Ammonia  
2 C00001 NAD+  
3 C00003 H2O

products:  
1 C00088 Nitrite  
3 C00004 NADH  
3 C00080 H+

R11104 : NADH phosphohydrolase

substrates:  
1 C00004 NADH  
1 C00001 H2O

products:  
1 C00020 AMP

1 C21113 NMNH

## 4 (S)-2-phenyloxirane

### 4.1 pathway candidate

number of active reactions: 4  
starts with basic: False  
reactions w/o dG: 1  
sum (dG + |dG|): 2.081496e+01  
dG: -1.728943e+01  
number of heterologous enzymes: 4  
number of cofactors: 3  
number of side reactions: 11

R02506 : cinnamaldehyde:NADP+ oxidoreductase (CoA-cinnamoylating) 6.126122e+00

substrates:

|   |        |                |
|---|--------|----------------|
| 1 | C00903 | Cinnamaldehyde |
| 1 | C00010 | CoA            |
| 1 | C00006 | NADP+          |

products:

|   |        |               |
|---|--------|---------------|
| 1 | C00540 | Cinnamoyl-CoA |
| 1 | C00005 | NADPH         |
| 1 | C00080 | H+            |

-R02255 : -trans-Cinnamate:CoA ligase (AMP-forming) 0

substrates:

|   |        |               |
|---|--------|---------------|
| 1 | C00020 | AMP           |
| 1 | C00013 | Diphosphate   |
| 1 | C00540 | Cinnamoyl-CoA |

products:

|   |        |                 |
|---|--------|-----------------|
| 1 | C00002 | ATP             |
| 1 | C00423 | trans-Cinnamate |
| 1 | C00010 | CoA             |

R11070 : trans-cinnamate carboxy-lyase -2.769690e+01

substrates:

|   |        |                 |
|---|--------|-----------------|
| 1 | C00423 | trans-Cinnamate |
|---|--------|-----------------|

products:

|   |        |         |
|---|--------|---------|
| 1 | C07083 | Styrene |
| 1 | C00011 | CO2     |

R05488 : styrene ,FADH2:oxygen oxidoreductase 4.281356e  
+00

substrates :

|   |        |         |
|---|--------|---------|
| 1 | C07083 | Styrene |
| 1 | C01352 | FADH2   |
| 1 | C00007 | Oxygen  |

products :

|   |        |                     |
|---|--------|---------------------|
| 1 | C20782 | (S)-2-Phenyloxirane |
| 1 | C00016 | FAD                 |
| 1 | C00001 | H2O                 |

## 4.2 thermodynamic profile

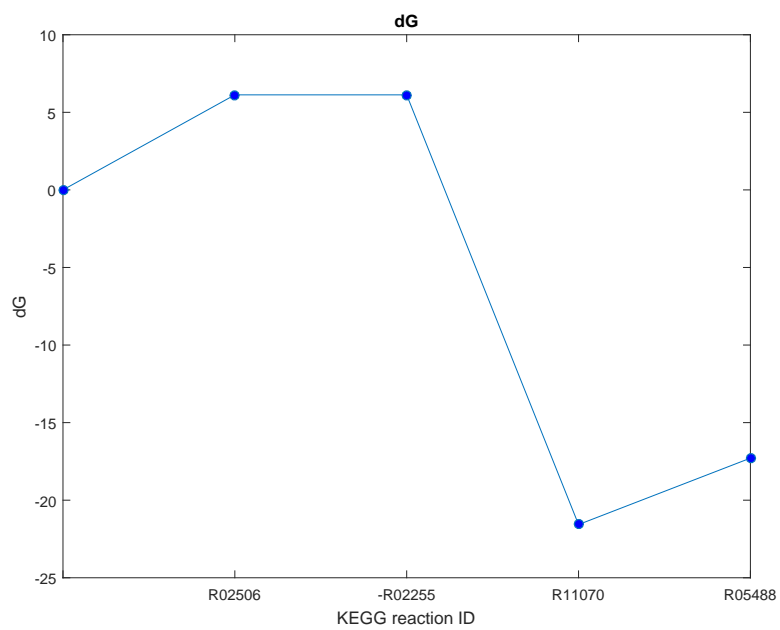

Figure 3: Thermodynamic profile for a pathway candidate for the synthesis of (S)-2-Phenyloxirane starting from cinnamaldehyde.



### 4.3 overall balance

reaction R02506

substrates:

1 C00540  
1 C00005  
1 C00080

products:

1 C00903  
1 C00010  
1 C00006

reaction R05488

substrates:

1 C20782  
1 C00016  
1 C00001

products:

1 C07083  
1 C01352  
1 C00007

reaction R11070

substrates:

1 C07083  
1 C00011

products:

1 C00423

reaction R02255

substrates:

1 C00020  
1 C00013  
1 C00540

products:

1 C00002  
1 C00423  
1 C00010

overall:  
C00001 -1  
C00002 1  
C00005 -1  
C00006 1  
C00007 1  
C00010 2  
C00011 -1  
C00013 -1  
C00016 -1  
C00020 -1  
C00080 -1  
C00423 2  
C00540 -2  
C00903 1  
C01352 1  
C07083 0  
C20782 -1

not balanced:  
C00001 -1  
C00002 1  
C00005 -1  
C00006 1  
C00007 1  
C00010 2  
C00011 -1  
C00013 -1  
C00016 -1  
C00020 -1  
C00080 -1  
C00423 2  
C00540 -2  
C00903 1  
C01352 1  
C20782 -1

#### 4.4 side reactions

R00004 : diphosphate phosphohydrolase

substrates:

|   |        |             |
|---|--------|-------------|
| 1 | C00013 | Diphosphate |
| 1 | C00001 | H2O         |

products:

|   |        |                |
|---|--------|----------------|
| 2 | C00009 | Orthophosphate |
|---|--------|----------------|

R00086 : ATP phosphohydrolase

substrates:

|   |        |     |
|---|--------|-----|
| 1 | C00002 | ATP |
| 1 | C00001 | H2O |

products:

|   |        |                |
|---|--------|----------------|
| 1 | C00008 | ADP            |
| 1 | C00009 | Orthophosphate |

R00087 : ATP diphosphohydrolase (diphosphate-forming)

substrates:

|   |        |     |
|---|--------|-----|
| 1 | C00002 | ATP |
| 1 | C00001 | H2O |

products:

|   |        |             |
|---|--------|-------------|
| 1 | C00020 | AMP         |
| 1 | C00013 | Diphosphate |

R00089 : ATP diphosphate-lyase (cyclizing

substrates:

|   |        |     |
|---|--------|-----|
| 1 | C00002 | ATP |
|---|--------|-----|

products:

|   |        |                  |
|---|--------|------------------|
| 1 | C00575 | 3',5'-Cyclic AMP |
| 1 | C00013 | Diphosphate      |

R00127 : ATP:AMP phosphotransferase

substrates:

|   |        |     |
|---|--------|-----|
| 1 | C00002 | ATP |
| 1 | C00020 | AMP |

products:  
           2          C00008  ADP

R00182 : AMP phosphoribohydrolase

substrates:  
           1          C00020  AMP  
           1          C00001  H2O

products:  
           1          C00147  Adenine  
           1          C00117  D-Ribose 5-phosphate

R00183 : adenosine 5'-monophosphate phosphohydrolase

substrates:  
           1          C00020  AMP  
           1          C00001  H2O

products:  
           1          C00212  Adenosine  
           1          C00009  Orthophosphate

R00190 : AMP:diphosphate phospho-D-ribosyltransferase

substrates:  
           1          C00020  AMP  
           1          C00013  Diphosphate

products:  
           1          C00147  Adenine  
           1          C00119  5-Phospho-alpha-D-ribose 1-diphosphate

-R00132 : -carbonate hydro-lyase (carbon-dioxide-forming)

substrates:  
           1          C00011  CO2  
           1          C00001  H2O

products:  
           1          C01353  Carbonic acid

-R00161 : -ATP:FMN adenylyltransferase

substrates:  
           1          C00013  Diphosphate

1 C00016 FAD

products:

1 C00002 ATP

1 C00061 FMN

-R10092 : -carbonate hydro-lyase (carbon-dioxide-forming)

substrates:

1 C00011 CO2

1 C00001 H2O

products:

1 C00288 HCO<sub>3</sub><sup>-</sup>

1 C00080 H<sup>+</sup>
